# Supplementary material
Source: PubMed Central journal article supplement (PMC1679757)
Supplement: 7601434s1.pdf [file 7601434s1.pdf]

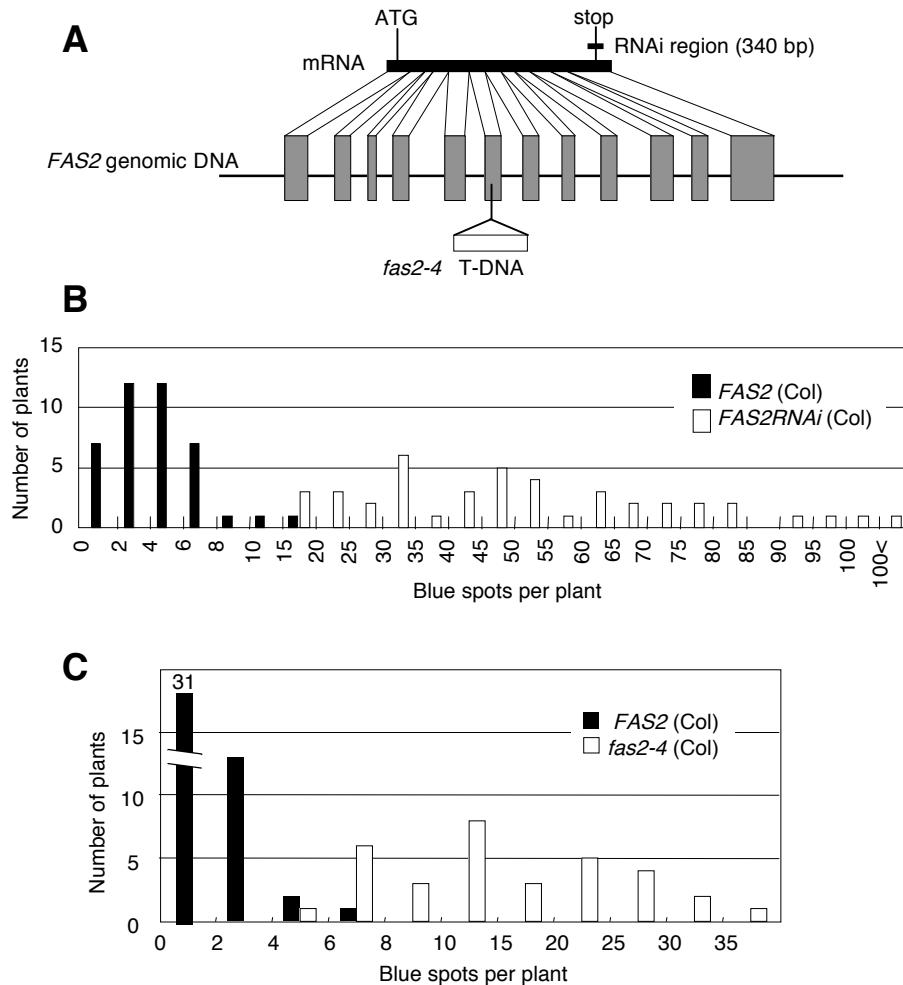

### HR frequency is elevated in Col background *fas* mutants.

(A) Schematic representation of the *FAS2* gene showing the region targeted by siRNA targets (the C-terminal coding region, i.e., nucleotide positions 1292 to 1631 in the mRNA) and the position of insertion of the T-DNA in *fas2-4*. Each grey box indicates an exon. In *fas2-4* T-DNA is inserted in 6th exon. Frequency distribution histograms showing the proportions of plants with a given number of blue GUS spots in wild-type and *FAS2* RNAi plants (B) and in wild-type and *fas2-4* plants (C).

#### Methods

An RNAi construct of corresponding to *FAS2* was used to transform the inverted repeat type GUS reporter line (1415; ecotype Col). T3 plants homozygous for the GUS recombination reporter and homozygous for the *FAS2* RNAi construct of *FAS2* were used for the GUS staining assay. Line 1415 was crossed with *fas2-4* (Col.). F3 plants homozygous for the GUS recombination reporter and homozygous for the mutant *fas2-4* (*GU-US/GU-US, fas2-4/fas2-4*) allele were used for the GUS staining assay. Plants homozygous for the GUS recombination reporter 1415 were used as a control in both experiments. Three-week-old seedlings were used for histochemical GUS staining.

## Supplementary Figure S1
