# Supplementary material
Source: PubMed Central journal article supplement (PMC1679757)
Supplement: 7601434s4.pdf [file 7601434s4.pdf]

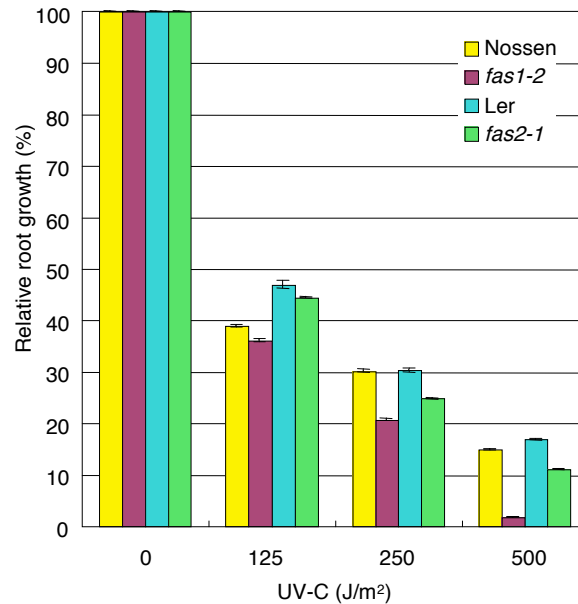

***fas* mutants show increased UV-C sensitivity.**

Relative root growth of *fas1-2* (Nossen), *fas2-1* (Ler) and wild-type plants after various doses of UV-C irradiation as indicated. The average root length of non-irradiated plants in each case was taken as 100 %. Error bars show indicate standard error (SE). Data are means  $\pm$  SE and represent the results of three independent experiments.

**Methods**

One-week-old sterile seedlings were irradiated with 125, 250, or 500 J/m<sup>2</sup> of UV-C at a dose rate of 10 J/m<sup>2</sup>/s. Irradiated seedlings were then transferred to fresh solid MS medium in a vertical position and incubated for 3 days at 22°C in the dark followed by 2 days at 22°C in the light. The main root length of each plant was measured 5 days after UV-C irradiation. The average growth of the main root for of each plant after UV-C irradiation was determined for each UV-C dose.

**Supplementary Figure S4**
