# Supplementary material
Source: PubMed Central journal article supplement (PMC1679757)
Supplement: 7601434s5.pdf [file 7601434s5.pdf]

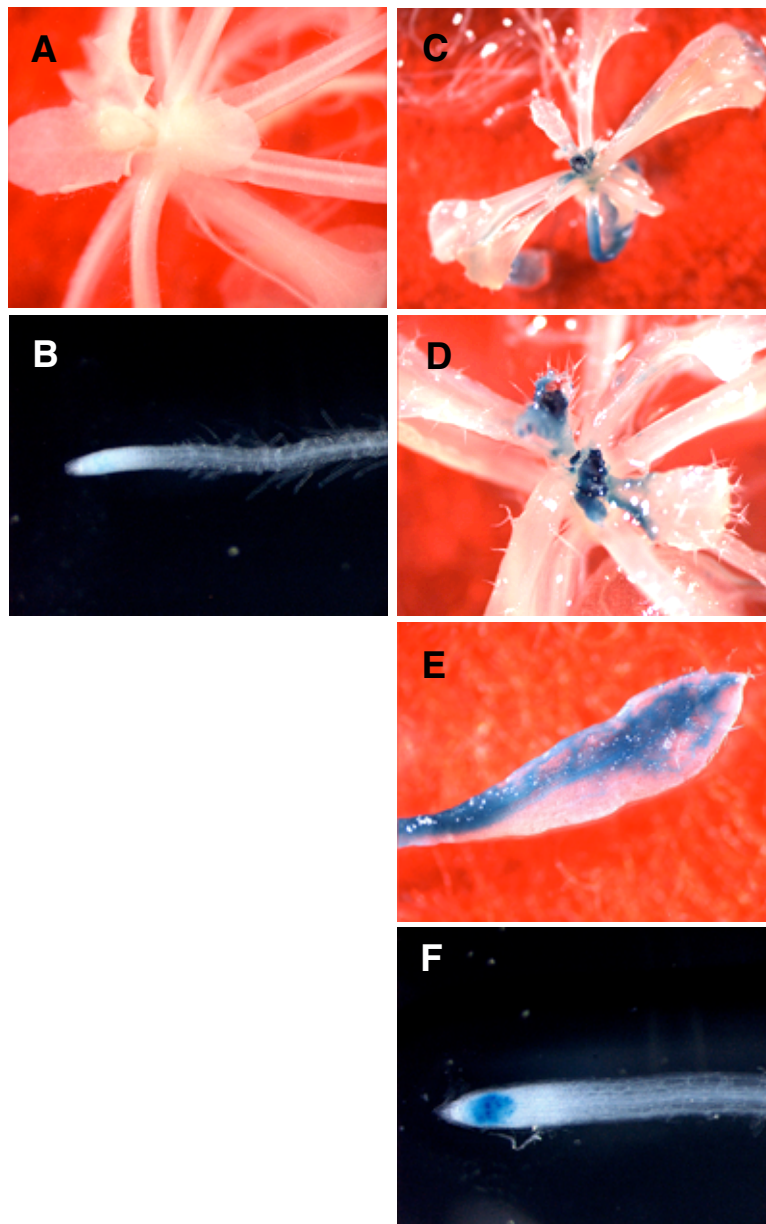

**G2 arrest in *fas1-2* as monitored by *AtCYCB1;1::GUS* expression.**

Expression of *AtCYCB1;1::GUS* in FAS1 control (A and B) and in *fas1-2* (C-F).

Methods of this assay are described in Materials and Methods.

**Supplementary Figure S5**
